# Supplementary material for: Adverse Effect of Nitrous Oxide in a Child with 5,10-Methylenetetrahydrofolate Reductase Deficiency
Source: Atypon-hosted journal article supplement (doi:10.1056/nejmoa021867), 2003-07-02
Supplement: nejm_selzer_45sa1-3.pdf [file nejm_selzer_45sa1-3.pdf]

# Supplementary Appendix

This appendix has been provided by the authors to give readers additional information about their work.

Supplement to: Selzer RR, Rosenblatt DS, Laxova R, Hogan K. Adverse Effect of Nitrous Oxide in a Child with 5,10-Methylenetetrahydrofolate Reductase Deficiency. *N Engl J Med* 2003;349:45-50.

**Supplementary Appendix 1. Oligonucleotide Primers Used for Amplification and Sequencing of MTHFR Exons from Genomic DNA.\***

| Exon | Primer Name                                      | Primer Use                             | Primer Sequence                                                                                                                                     | Product Size | Magnesium Level | Annealing Temperature |
|------|--------------------------------------------------|----------------------------------------|-----------------------------------------------------------------------------------------------------------------------------------------------------|--------------|-----------------|-----------------------|
|      |                                                  |                                        |                                                                                                                                                     | bp           | mmol/liter      | °C                    |
| 1    | MTHFR 1F#2<br>MTHFR 1R                           | PCR, sequencing<br>PCR, sequencing     | 5'GCC ACT CAG GTG TCT TGA TGT GTC GG3'<br>5'TGA CAG TTT GCT CCC CAG GCA C3'†                                                                        | 384          | 3.0             | 64.0                  |
| 2    | MTHFR 2F<br>MTHFR 2R<br>MTHFR 2F#2<br>MTHFR 2R#3 | PCR<br>PCR<br>Sequencing<br>Sequencing | 5'GGA AGG CAG TGA CGG ATG GTA T3'‡<br>5'ACC AAG TTC AGG CTA CCA AGT GG3'‡<br>5'TAT TTC TCC TGG AAC CTC TCT TCA3'<br>5'GCC TCC GGG AAA GCC AGA ACC3' | 373          | 1.5             | 60.0                  |
| 3    | MTHFR 3F<br>MTHFR 3R                             | PCR, sequencing<br>PCR, sequencing     | 5'GGG TGA GAC CCA GTG ACT ATG ACC3'<br>5'CCC TAG CTC CAT CCC CGC CAC CAG G3'                                                                        | 193          | 1.5             | 67.5                  |
| 4    | MTHFR 4F<br>MTHFR 4R                             | PCR, sequencing<br>PCR, sequencing     | 5'GGT GGA GGC CAG CCT CTC CTG3'<br>5'GCG GTG AGA GTG GGG TGG AGG G3'                                                                                | 285          | 1.5             | 67.5                  |
| 5    | MTHFR 5F#2<br>MTHFR 5R#2                         | PCR, sequencing<br>PCR, sequencing     | 5'GCT GGC CAG CAG CCG CCA CAG CC3'<br>5'GGA TCT CTG GGC CAC TGC CCT C3'                                                                             | 315          | 1.5             | 67.5                  |
| 6    | MTHFR 6F<br>MTHFR 6R                             | PCR, sequencing<br>PCR, sequencing     | 5'TGC TTC CGG CTC CCT CTA GCC3'†<br>5'CCT CCC GCT CCC AAG AAC AAA G3'†                                                                              | 250          | 1.5             | 60.0                  |
| 7    | MTHFR 7F<br>MTHFR 7R<br>MTHFR 7R#2               | PCR, sequencing<br>PCR<br>Sequencing   | 5'GCC CTC TGT CAG GAG TGT GCC C3'<br>5'GGG CAG GGG ATG AAC CAG GGT CCC C3'<br>5'GGT CCC CAC TTC CAG CAT CAC3'                                       | 271          | 1.5             | 67.5                  |
| 8    | MTHFR 8F#2<br>MTHFR 8R#2                         | PCR, sequencing<br>PCR, sequencing     | 5'CAG GGT GCC AAA CCT GAT GGT CGC C3'<br>5'CCA CGG GTG CCG GTC AAG AGA GG3'                                                                         | 283          | 1.5             | 67.5                  |
| 9    | MTHFR 9F#2<br>MTHFR 9R#2                         | PCR, sequencing<br>PCR, sequencing     | 5'GTT GGT GAC AGG CAC CTG TCT CT3'<br>5'TGT TCA ACG AAG GGC CTG GTA C3'                                                                             | 182          | 1.5             | 67.5                  |
| 10   | MTHFR 10F<br>MTHFR 10R                           | PCR, sequencing<br>PCR, sequencing     | 5'GGC CCA GGT CTT ACC CCC ACC CC3'<br>5'GGT GGG CGG GGC AAG CTT GCC CCC3'                                                                           | 189          | 1.5             | 67.5                  |
| 11   | MTHFR 11F<br>MTHFR 11R                           | PCR, sequencing<br>PCR, sequencing     | 5'GCA TGT GTG CGT GTG TGC GGG GG3'<br>5'CCT CTG CAG GAG CAA GTG CTC CCC3'                                                                           | 516          | 1.5             | 67.5                  |

\* MTHFR encodes 5,10-methylenetetrahydrofolate reductase. PCR denotes polymerase chain reaction.

† The sequence was reported by Sibani et al.<sup>7</sup>

‡ The sequence was reported by Kluijtmans et al.<sup>8</sup>

**Supplementary Appendix 2. Primers Used to Sequence the Complementary DNA Transcript.**

| Fragment  | Primer Name | Primer Sequence                        |
|-----------|-------------|----------------------------------------|
| Sense     | MTHFR 1F#2  | 5'GCC ACT CAG GTG TCT TGA TGT GTC GG3' |
|           | MTHFR 518F  | 5'GCT GCC GTC AGC GCC TGG AGG AG3'     |
|           | MTHFR 972F  | 5'GGA CGT GAT TGA GCC AAT CAA AGA C3'  |
|           | MTHFR 1206F | 5'GGA AGA TGT ACG TCC CAT CTT CTG G3'  |
|           | MTHFR 1683F | 5'GCG GAA GCA CTT CTG CAA GTG CTG3'    |
| Antisense | MTHFR 515R  | 5'GTC ATG TGC AGG ATG GTC TCC AG3'     |
|           | MTHFR 1022R | 5'CCA TAG TTG CGG ATG GCA GCA TCG3'    |
|           | MTHFR 1535R | 5'TCC TTC AGC AGG CTG GTC TCA GCC G3'  |
|           | MTHFR 1806R | 5'GAC AGC ATT CGG CTG CAG TTC AGG3'    |
|           | MTHFR endR  | 5'CAC TCC AGT CTA GCT GCC ATT GTC3'    |

**Supplementary Appendix 3. Primers Used to Amplify Complementary DNA as Seven Overlapping Fragments.**

| Fragment | Primer Name              | Primer Sequence                                                                  | Product Size | Magnesium Level   | Annealing Temperature |
|----------|--------------------------|----------------------------------------------------------------------------------|--------------|-------------------|-----------------------|
|          |                          |                                                                                  | <i>bp</i>    | <i>mmol/liter</i> | <i>°C</i>             |
| 1        | X13F<br>X14R             | 5'CGG ACA GCC ATA GCT GAG GAG C3'<br>5'GGC TGG TCT CAG CCG CCA GG3'              | 1584         | 1.5               | 66.0                  |
| 2        | MTHFR 1F#2<br>MTHFR endR | 5'GCC ACT CAG GTG TCT TGA TGT GTC GG3'<br>5'CAC TCC AGT CTA GCT GCC ATT GTC3'    | 2206         | 1.5               | 64.0                  |
| 3        | X17F<br>X2R              | 5'GCG AGA GAA ACG GAG GCT CC3'<br>5'CAT CTG CAC CTG CCA GTC ACT GCC3'            | 977          | 1.5               | 67.5                  |
| 4        | X3F<br>X4R               | 5'CCT GGC TGT GGA GGC CTG ATG CTG3'<br>5'GGA TCC TTG CGA CTG CGA GTG GCT C3'     | 1275         | 1.5               | 68.5                  |
| 5        | X5F<br>X6R               | 5'GGC CAC AAA TCA AAG CAA GG3'<br>5'CTC TTT GGG TGG CAG GCA GCC G3'              | 1256         | 1.5               | 68.5                  |
| 6        | X7F<br>X8R               | 5'CCA GCT ACT CTG TCC AGG CCA CTG3'<br>5'GGC TCA AGC GAT CTA CCT GCC TTG3'       | 1274         | 1.5               | 68.5                  |
| 7        | X11F<br>X12R             | 5'CTC CAT CAG CTT ATG GGA TCC TTG TC3'<br>5'GGC TGA AGC AGA GGA GTG ATC TCA GC3' | 1174         | 1.5               | 67.5                  |
